# Supplementary material for: The Ameliorative Effect of COST on Diet-Induced Lipid Metabolism Disorders by Regulating Intestinal Microbiota
Source: MDPI journal article supplement (doi:10.3390/md20070444), 2022-07-07
Supplement: s1 [file s1]

**Table S1:** Effects of COST on body weight and various physiological and biochemical parameters in mice with disorders of lipid metabolism, correlated with Figure 1 ( $n = 6$ ). Data are expressed as mean  $\pm$  SEM and statistically analyzed via one-way ANOVA; \* $p < 0.05$ , \*\* $p < 0.01$ , \*\*\* $p < 0.001$ ; \*\*\*\* $p < 0.0001$ .

|                     | CTRL                 | MOD              | COST-H              | COST-M               | COST-L               |
|---------------------|----------------------|------------------|---------------------|----------------------|----------------------|
| Body weight(g)      | 26.76 $\pm$ 0.083*** | 33.62 $\pm$ 0.48 | 32.28 $\pm$ 0.56    | 33.10 $\pm$ 0.60     | 33.64 $\pm$ 0.89     |
| Serum TC(mmol/L)    | 3.90 $\pm$ 0.13****  | 5.66 $\pm$ 0.20  | 4.35 $\pm$ 0.17**** | 4.59 $\pm$ 0.12**    | 4.98 $\pm$ 0.26*     |
| Serum TG(mmol/L)    | 0.33 $\pm$ 0.04****  | 0.67 $\pm$ 0.03  | 0.48 $\pm$ 0.02**   | 0.47 $\pm$ 0.03**    | 0.52 $\pm$ 0.04*     |
| Serum HDL-C(mmol/L) | 7.84 $\pm$ 0.31****  | 4.70 $\pm$ 0.06  | 6.84 $\pm$ 0.26**** | 6.42 $\pm$ 0.25***   | 5.52 $\pm$ 0.10      |
| Serum LDL-C(mmol/L) | 1.83 $\pm$ 0.07****  | 3.60 $\pm$ 0.21  | 2.45 $\pm$ 0.15***  | 2.67 $\pm$ 0.15**    | 3.34 $\pm$ 0.26      |
| Serum NEFA (mmol/L) | 0.53 $\pm$ 0.01****  | 1.04 $\pm$ 0.02  | 0.56 $\pm$ 0.02**** | 0.61 $\pm$ 0.023**** | 0.64 $\pm$ 0.026**** |
| Serum GLU (mmol/L)  | 5.51 $\pm$ 0.11****  | 12.23 $\pm$ 0.34 | 9.18 $\pm$ 0.47**** | 10.85 $\pm$ 0.053    | 11.62 $\pm$ 0.55     |

**Table S2:** Mice body weight, serum and liver biochemical markers, and liver and adipose tissue weight during FMT, correlated with Fiure 3, Figure 4 and Figure 5 ( $n = 6$ ).Data are expressed as mean  $\pm$  SEM and statistically analyzed via one-way ANOVA; \* $p < 0.05$ , \*\* $p < 0.01$ , \*\*\* $p < 0.001$ ; \*\*\*\*  $p < 0.0001$ .

|                          | STD                 | Control             | Model              | COST-H-FMT           | COST-M-FMT          | COST-L-FMT           |
|--------------------------|---------------------|---------------------|--------------------|----------------------|---------------------|----------------------|
| Body weight(g)           | 28.84 $\pm$ 0.55*** | 29.85 $\pm$ 0.52*   | 32.49 $\pm$ 0.50   | 26.19 $\pm$ 0.65***  | 27.38 $\pm$ 0.71*** | 27.88 $\pm$ 0.65***  |
| LiverWeight(g)           | 0.9807 $\pm$ 0.05** | 1.0156 $\pm$ 0.04*  | 1.1457 $\pm$ 0.03  | 0.9214 $\pm$ 0.02*** | 0.9391 $\pm$ 0.03** | 0.8758 $\pm$ 0.03*** |
| Brown adipose tissue (g) | 0.132 $\pm$ 0.01    | 0.125 $\pm$ 0.01    | 0.098 $\pm$ 0.00   | 0.118 $\pm$ 0.00     | 0.109 $\pm$ 0.01    | 0.108 $\pm$ 0.01     |
| Subcutaneous adipose     | 0.199 $\pm$ 0.01*** | 0.400 $\pm$ 0.04*   | 0.557 $\pm$ 0.04   | 0.207 $\pm$ 0.03***  | 0.326 $\pm$ 0.04*** | 0.352 $\pm$ 0.05**   |
| Perirenal adipose        | 0.071 $\pm$ 0.01*** | 0.210 $\pm$ 0.03*** | 0.422 $\pm$ 0.04   | 0.150 $\pm$ 0.02***  | 0.175 $\pm$ 0.03*** | 0.194 $\pm$ 0.03***  |
| Epididymal adipose       | 0.344 $\pm$ 0.02*** | 0.789 $\pm$ 0.10*** | 1.325 $\pm$ 0.09   | 0.540 $\pm$ 0.10***  | 0.601 $\pm$ 0.07*** | 0.652 $\pm$ 0.08***  |
| Fat/body ratio (%)       | 2.58%***            | 5.08%***            | 7.41%              | 3.88%***             | 4.43%***            | 4.68%***             |
| Serum TC(mmol/L)         | 7.84 $\pm$ 0.28***  | 6.89 $\pm$ 0.52***  | 10.30 $\pm$ 0.42   | 7.34 $\pm$ 0.19***   | 7.71 $\pm$ 0.37***  | 7.96 $\pm$ 0.42**    |
| Serum TG(mmol/L)         | 0.95 $\pm$ 0.03*    | 0.83 $\pm$ 0.13**   | 1.45 $\pm$ 0.16    | 0.50 $\pm$ 0.16***   | 0.77 $\pm$ 0.07**   | 1.04 $\pm$ 0.08      |
| Serum HDL-C(mmol/L)      | 3.76 $\pm$ 0.01***  | 3.14 $\pm$ 0.16     | 2.56 $\pm$ 0.16    | 4.26 $\pm$ 0.15***   | 4.22 $\pm$ 0.21***  | 3.61 $\pm$ 0.21***   |
| Serum LDL-C(mmol/L)      | 0.28 $\pm$ 0.04***  | 0.95 $\pm$ 0.15***  | 2.40 $\pm$ 0.38    | 0.90 $\pm$ 0.19***   | 0.87 $\pm$ 0.08***  | 1.22 $\pm$ 0.15**    |
| Serum ALT(mmol/L)        | 82.72 $\pm$ 3.88*** | 45.38 $\pm$ 5.85*** | 131.16 $\pm$ 10.71 | 50.16 $\pm$ 2.39***  | 50.16 $\pm$ 5.85*** | 46.99 $\pm$ 0.48***  |
| Serum AST(mmol/L)        | 84.30 $\pm$ 3.80**  | 79.42 $\pm$ 2.16    | 106.40 $\pm$ 1.52  | 67.73 $\pm$ 2.46***  | 76.90 $\pm$ 2.98    | 77.10 $\pm$ 2.78     |
| Serum Glucose(mmol/L)    | 8.06 $\pm$ 0.37**   | 7.23 $\pm$ 0.44***  | 11.02 $\pm$ 0.42   | 6.35 $\pm$ 0.47***   | 8.02 $\pm$ 0.22***  | 7.99 $\pm$ 0.36***   |
| Serum NEFA (mmol/L)      | 0.94 $\pm$ 0.06***  | 1.07 $\pm$ 0.02*    | 1.25 $\pm$ 0.04    | 0.75 $\pm$ 0.04***   | 0.86 $\pm$ 0.04***  | 0.99 $\pm$ 0.03***   |
| Serum TBA (mmol/L)       | 2.31 $\pm$ 0.16***  | 4.37 $\pm$ 0.16     | 5.28 $\pm$ 0.46    | 3.04 $\pm$ 0.18***   | 3.30 $\pm$ 0.14***  | 4.16 $\pm$ 0.25*     |
| Liver TG level(mmol/L)   | 3.47 $\pm$ 0.51***  | 5.80 $\pm$ 1.10**   | 9.04 $\pm$ 2.42    | 2.96 $\pm$ 0.31***   | 4.99 $\pm$ 0.96**   | 5.04 $\pm$ 1.46**    |
| Liver TC level(mmol/L)   | 1.47 $\pm$ 0.39**   | 1.98 $\pm$ 0.15*    | 2.69 $\pm$ 0.40    | 1.68 $\pm$ 0.411**   | 1.70 $\pm$ 0.23*    | 2.16 $\pm$ 0.28      |
| Liver LDL- C level       | 0.38 $\pm$ 0.076**  | 0.44 $\pm$ 0.097    | 0.67 $\pm$ 0.060   | 0.38 $\pm$ 0.087*    | 0.39 $\pm$ 0.092*   | 0.47 $\pm$ 0.11      |
| Liver TBA level          | 59.13 $\pm$ 8.89*** | 86.13 $\pm$ 11.77*  | 123.33 $\pm$ 18.36 | 66.90 $\pm$ 13.43*** | 78.74 $\pm$ 19.06** | 83.98 $\pm$ 22.45**  |

**Table S3** Animal Feed Information

| <b>Feed</b>                                 | <b>Protein<br/>(%)</b> | <b>Carbohydrate<br/>(%)</b> | <b>FAT<br/>(%)</b> | <b>Fiber<br/>(%)</b> | <b>Calcium/Phosphorus<br/>(%)</b> |
|---------------------------------------------|------------------------|-----------------------------|--------------------|----------------------|-----------------------------------|
| Standard<br>formula feed                    | 20                     | 0                           | 4.3                | 4.8                  | 1.19                              |
| D12327 High-<br>fat and high-<br>sugar feed | 23                     | 46.1                        | 20.4               | 5.5                  | 5                                 |

**Table S4** Primer sequence

| Gene           | Forward primer                 | Reverse primer                 |
|----------------|--------------------------------|--------------------------------|
| SREBP          | 5'-CAGCTATTGGCCTTCCTCAG-3'     | 5'-GGTTACTGGCGGTCACTGTC-3'     |
| FAS            | 5'-ATGCACACTCTGCGATGAAG-3'     | 5'-TTCAGGGTCATCCTGTCTCC-3'     |
| PPAR $\gamma$  | 5'-AGACCACTCGCATTCCCTTTG-3'    | 5'-CATTGGGTCACTCTTGTGA-3'      |
| PPAR $\alpha$  | 5'-GCAGCTCGTACAGGTCATCA-3'     | 5'-ACTGCCGTTGTCTGTCACTG-3'     |
| CYP7A1         | 5'-GGGATTGCTGTGGTAGTGAGC-3'    | 5'-GGTATGGAATCAACCCGTTGTC-3'   |
| FXR            | 5'-GCTTGATGTGCTACAAAAGCTG-3'   | 5'-GTGGTGATGGTTGAATGTCC-3'     |
| Occludin       | 5'-ATGTCCGGCCGATGCTCTC-3'      | 5'-TTTGGCTGCTCTTGGGTCTGTAT-3'  |
| Claudin        | 5'-TCTACGAGGGACTGTGGATG-3'     | 5'-TCAGATTCAGCTAGGAGTCG-3'     |
| ZO1            | 5'-ACCCGAAACTGATGCTGTGGATAG-3' | 5'-AAATGGCCGGGCAGAACTTGTGTA-3' |
| $\beta$ -Actin | 5'-CGTGAAAAGATGACCCAGA-3'      | 5'-GTCCATCACAATGCCTGT-3'       |

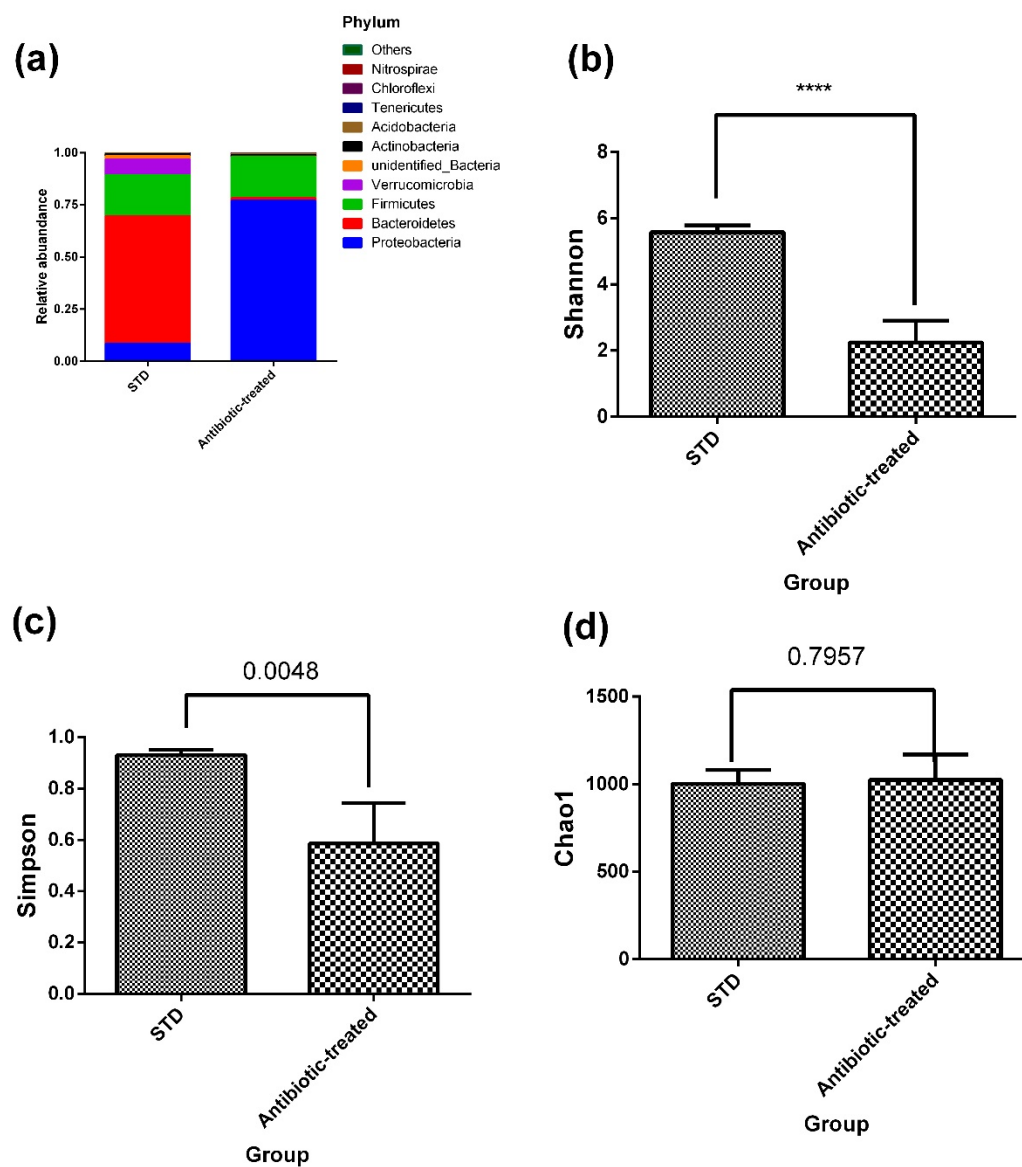

**Figure S1:** Species levels of phylum differences in mice following antibiotic intervention (a), and changes in Alpha index levels (b-d)( $n = 6$ ).
